# Supplementary material for: OCEAN-C: mapping hubs of open chromatin interactions across the genome reveals gene regulatory networks
Source: PubMed Central journal article supplement (PMC5926533; doi:10.1186/s13059-018-1430-4), 2018-04-24
Supplement: 13059_2018_1430_MOESM1_ESM.pdf [file 13059_2018_1430_MOESM1_ESM.pdf]

# Figure S1

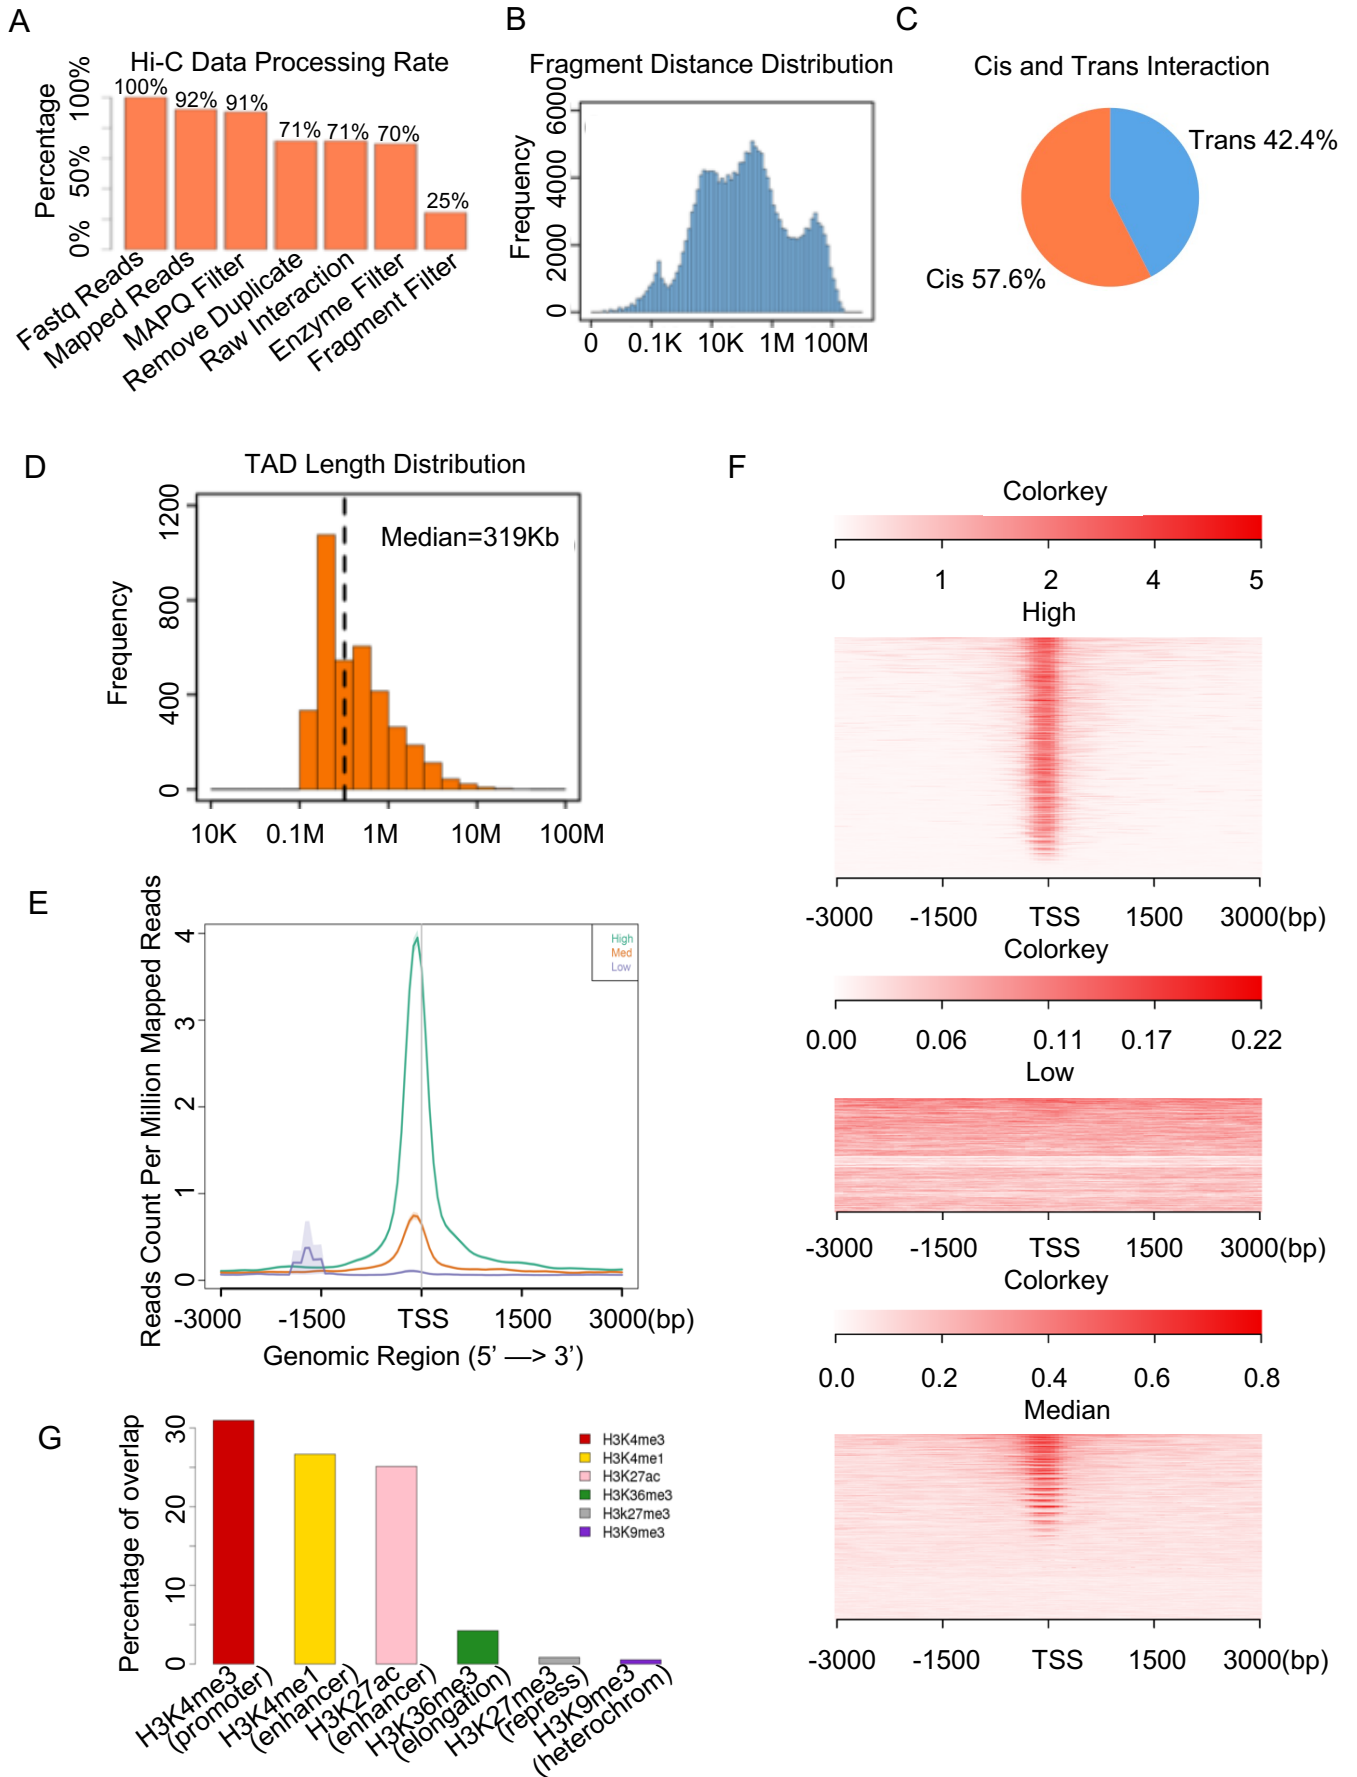

## **Supplementary Figure 1. Quality control of Hi-C and FAIRE-seq experiments.**

(A–D) Quality control of the Hi-C experiment (U266 cells). (A) Proportion of filtered reads in Hi-C data processing. (B) The distribution of fragment distances in cleaned Hi-C data. (C) Percentage of inter-chromosomal (trans) and intra-chromosomal (cis) interaction reads of clean Hi-C data. (D) The length distribution of topological associated domains (TADs). (E–G) Quality control of the FAIRE-seq experiment (U266 cells). (E) Reads distribution of FAIRE-seq peaks around transcription start sites (TSSs). The peak signals are averaged for three groups according to corresponding RNA-seq expression: high (top 30%), median (middle 40%), and low (bottom 30%). (F) Heat map of FAIRE-seq peaks around TSSs ranked by gene expression. (G) Percent of FAIRE-seq peaks overlapping various histone modification markers.

# Figure S2

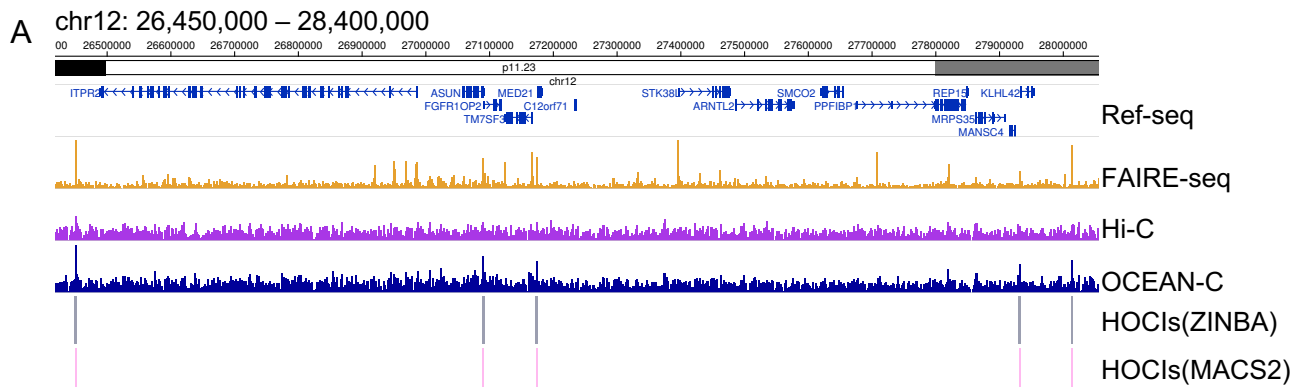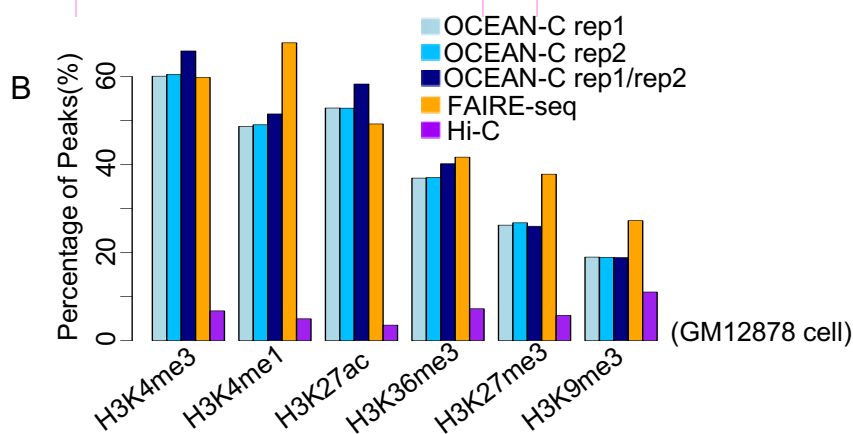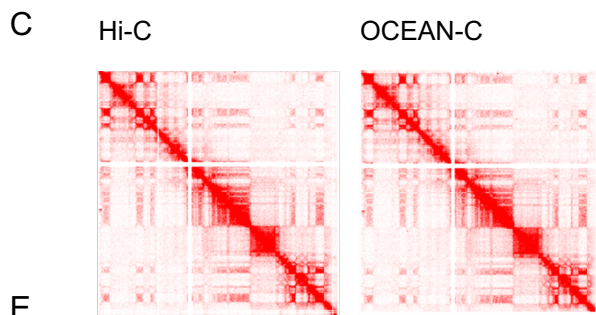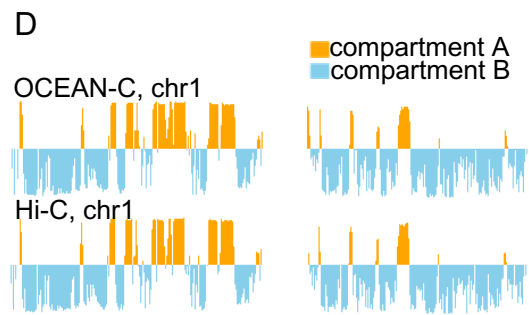

**E**

|          | chr1   | chr2   | chr3   | chr4   | chr5   | chr6   | chr7   | chr8   |
|----------|--------|--------|--------|--------|--------|--------|--------|--------|
| cor(ICE) | 0.9916 | 0.9883 | 0.9862 | 0.9874 | 0.9885 | 0.9856 | 0.9963 | 0.9930 |
| cor(raw) | 0.9934 | 0.9928 | 0.9942 | 0.9941 | 0.9924 | 0.9922 | 0.9949 | 0.9933 |
|          | chr9   | chr10  | chr11  | chr12  | chr13  | chr14  | chr15  | chr16  |
| cor(ICE) | 0.9837 | 0.9857 | 0.9906 | 0.9833 | 0.9763 | 0.9894 | 0.9985 | 0.9870 |
| cor(raw) | 0.9943 | 0.9932 | 0.9919 | 0.9926 | 0.9942 | 0.9924 | 0.9950 | 0.9917 |
|          | chr17  | chr18  | chr19  | chr20  | chr21  | chr22  | chrX   | chrY   |
| cor(ICE) | 0.9929 | 0.9985 | 0.9989 | 0.9881 | 0.9987 | 0.9989 | 0.9850 | NA     |
| cor(raw) | 0.9923 | 0.9933 | 0.9904 | 0.9925 | 0.9943 | 0.9928 | 0.9928 | NA     |

**F**

|                                      | U266  | RPMI8226 | GM12878 Rep1 | GM12878 Rep2 |
|--------------------------------------|-------|----------|--------------|--------------|
| OCEAN-C / Hi-C conserved compartment | 95.6% | 91.0%    | 91.2%        | 93.3%        |
| OCEAN-C / Hi-C conserved TAD         | 92.3% | 94.1%    | 93.3%        | 93.2%        |

**Supplementary Figure 2. Comparisons between OCEAN-C and Hi-C data.** (A) The browser view of a 2 Mb genomic region showing HOCs called with ZINBA and MACS2 algorithms, as well as the read depth of Hi-C, OCEAN-C and FAIRE-seq data in U266 cells. (B) Overlaps between histone modification markers and the peaks determined by OCEAN-C, FAIRE-seq and Hi-C in GM12878 cells. (C) Interaction heat map of chromosome X from Hi-C and OCEAN-C data (U266). (D) Compartment A/B of chromosome 1 determined by Hi-C and OCEAN-C (U266). (E) Pearson correlations of raw or ICE normalized Hi-C and OCEAN-C interaction matrices of each chromosome (U266). The upper triangular interaction matrices (including diagonal) are used to compute correlations. (F) Proportions of conserved compartments and TADs between Hi-C and OCEAN-C data. For conserved compartments, the proportion of 200 kb bins with the same compartment types between Hi-C and OCEAN-C is computed. When two TADs called from Hi-C and OCEAN-C data overlap with each other by >70% in length, they are regarded as conserved TADs.

Figure S3

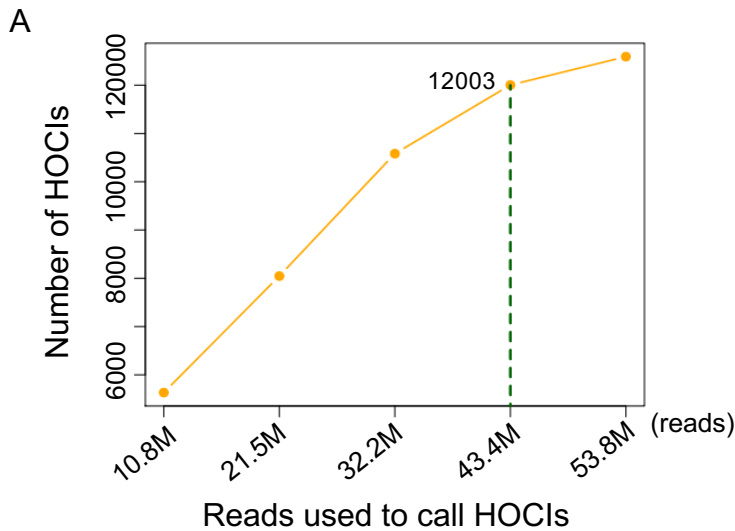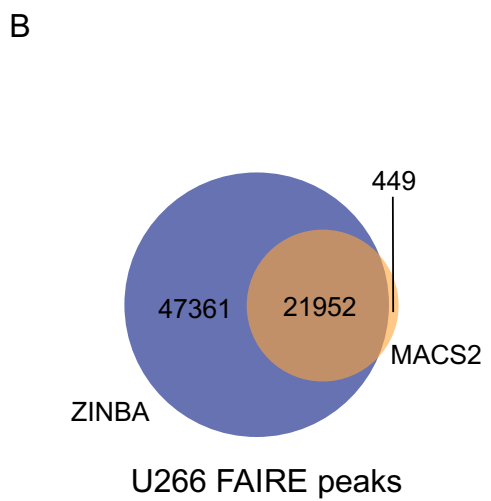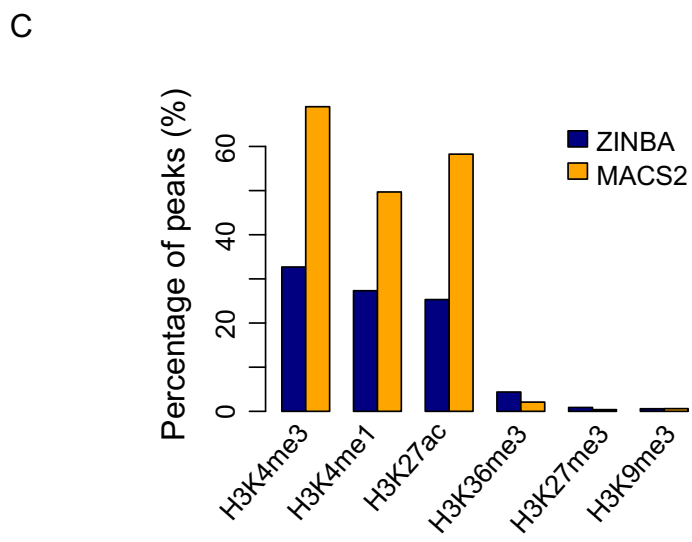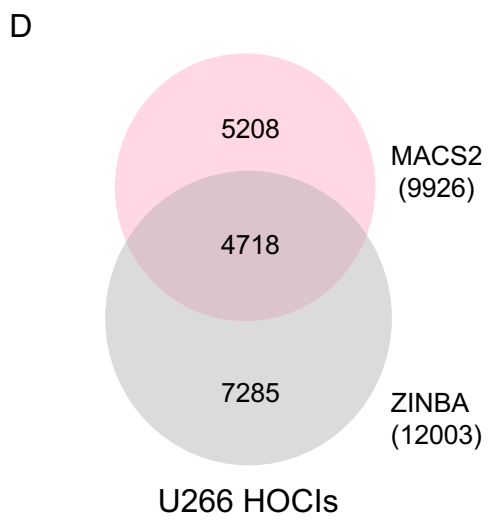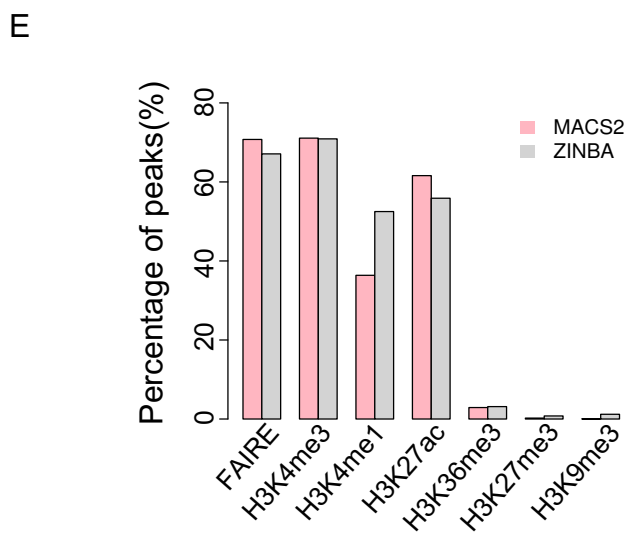

**Supplementary Figure 3. Comparisons between two peak calling algorithms.** (A) HOCIs called with different sequencing depth of U266 cells. M: million reads. (B) Venn diagram of the open chromatin peaks called from FAIRE-seq data using ZINBA and MACS2 algorithms (U266). (C) Percentage of open chromatin peaks called from FAIRE-seq data using ZINBA and MACS2 that overlap with different histone modification markers (U266). (D) Venn diagram of the HOCIs called from OCEAN-C data using ZINBA and MACS2 (U266). (E) Percentage of HOCIs called from OCEAN-C data using ZINBA and MACS2 that overlap with different histone modification markers (U266).

Figure S4

**A**

| DNase-C Cleaned-Pairs | DNase-C Cis Cleaned-Pairs | DNase-C Peaks | DNase-seq Peaks | Overlapped Peaks |
|-----------------------|---------------------------|---------------|-----------------|------------------|
| 72769564              | 48608321                  | 5958          | 17883           | 18               |

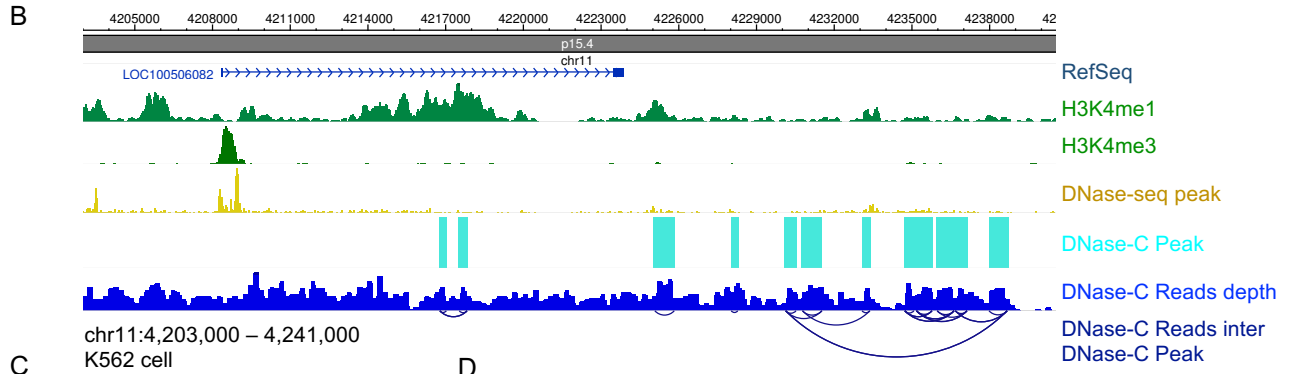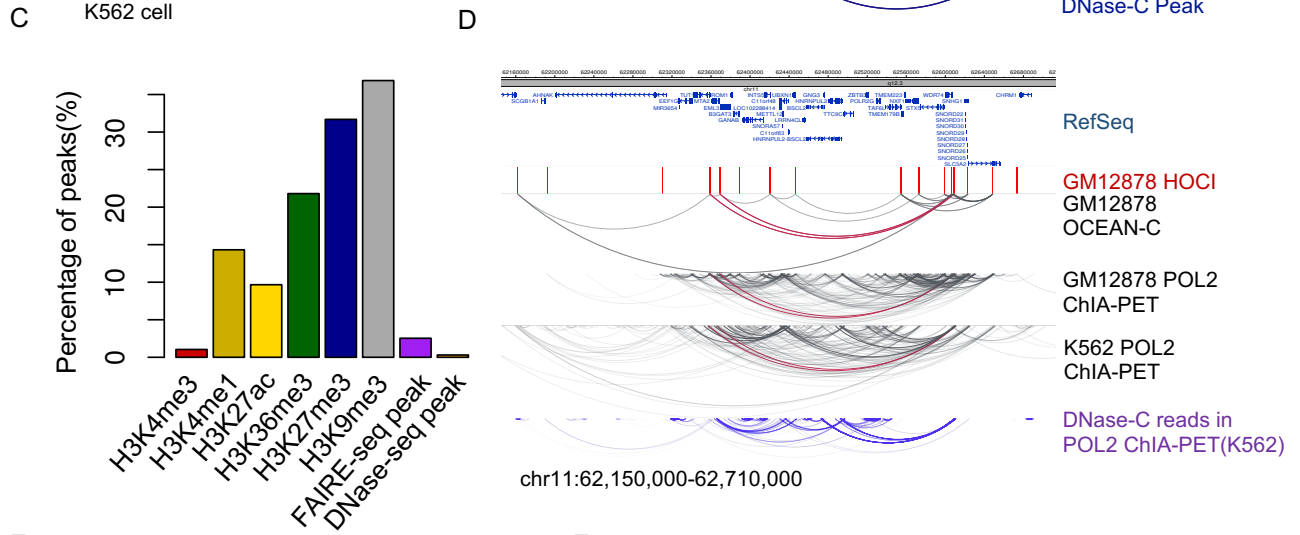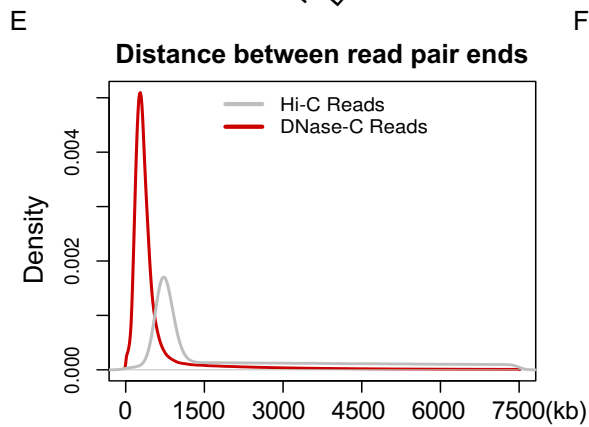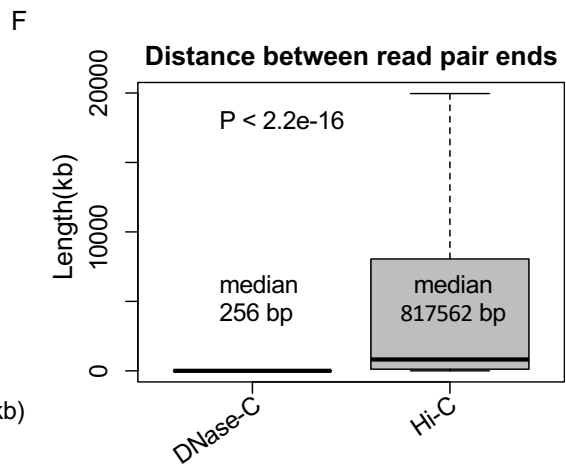

**Supplementary Figure 4. Comparisons between DNase-C and OCEAN-C.** (A) Statistics of DNase-seq and DNase-C peak calling steps (K562 cells). (B) The browser view of a 38 kb genomic region showing DNase-C read pairs connecting DNase-C peaks, together with the signals of DNase I and histone modification markers H3K4me1 and H3K4me3. (C) Barplot showing the overlaps between DNase-C peaks and open chromatin related markers. (D) The browser view of a 560 kb genomic region showing read pairs of DNase-C, POL2 ChIA-PET and OCEAN-C data. OCEAN-C: read pairs with both ends mapped to HOICs, 'DNase-C reads in POL2 ChIA-PET': read pairs from DNase-C with both ends mapped to POL2 ChIA-PET cluster anchors. (E) The distribution of distance between two ends of read pairs from Hi-C and DNase-C. (F) Boxplots showing the distance between two ends of read pairs from Hi-C and DNase-C. p-value is generated using Wilcoxon test.



# Figure S5

A

cluster1 (U266 cell line)

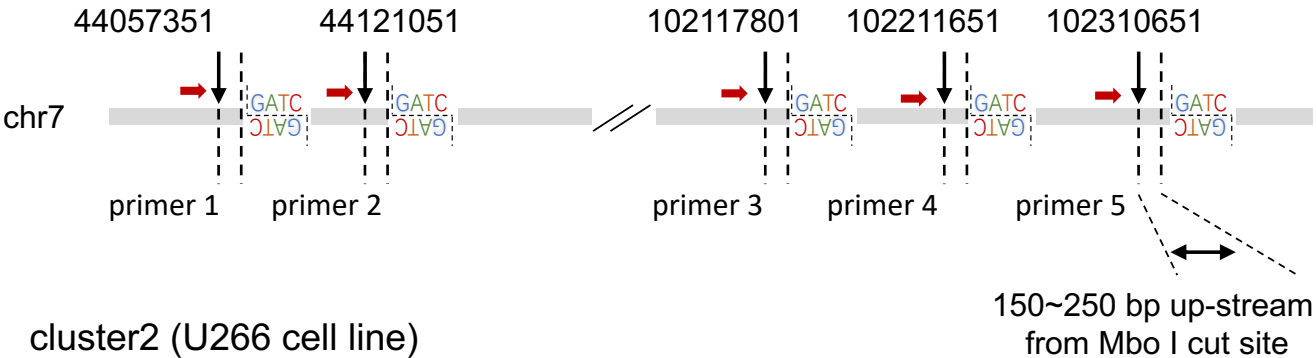

cluster2 (U266 cell line)

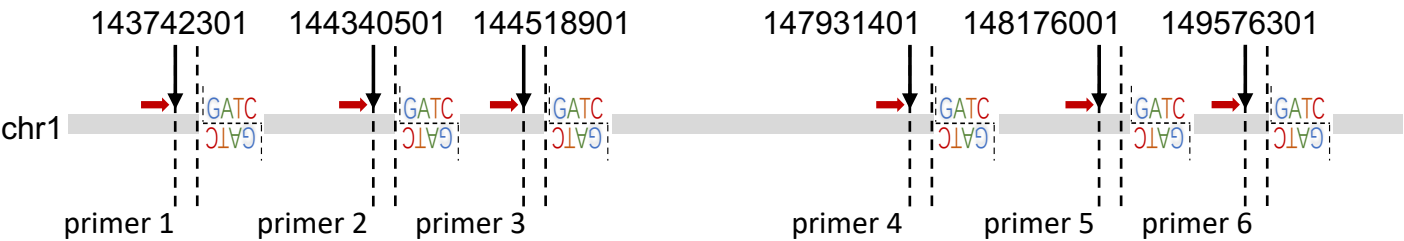

B

cluster1 (U266 cell line)

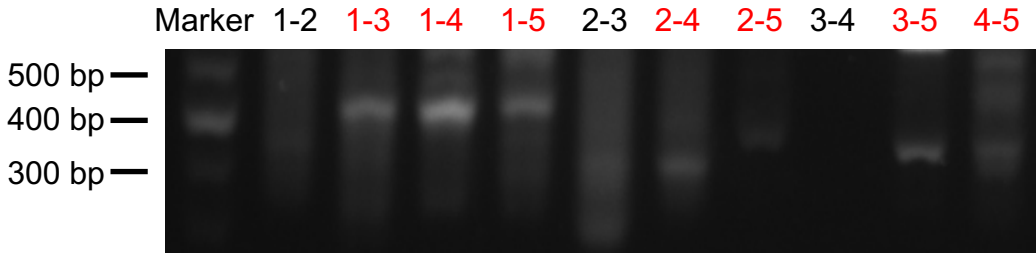

cluster2 (U266 cell line)

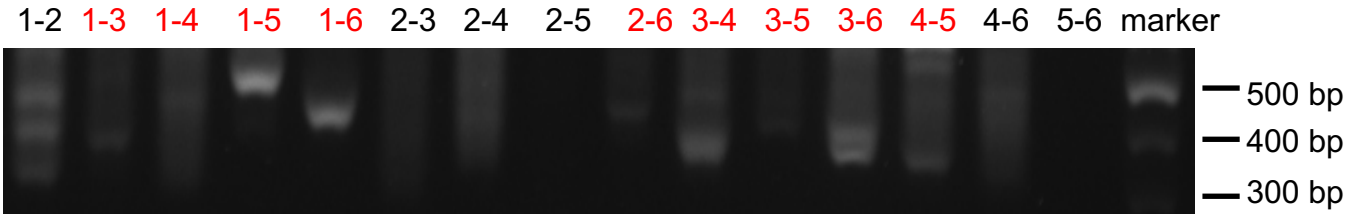

**Supplementary Figure 5. 3C validation of chromatin interaction**

**clusters captured by OCEAN-C.** (A) Schematic plot of the sites of 3C

primers in two interaction clusters. 'GATC' is the cutting site of Mbol.

Red arrows: 3C primer sites; vertical dashed lines: 150~250 bp

upstream of the Mbol cutting sites; number on the top: 5' genome

positions of the 3C primers. (B) PCR results of primer combinations

from (A). Red labels indicate detected 3C interactions between

indicated primer pairs, while black labels indicate failed detection.

Figure S6

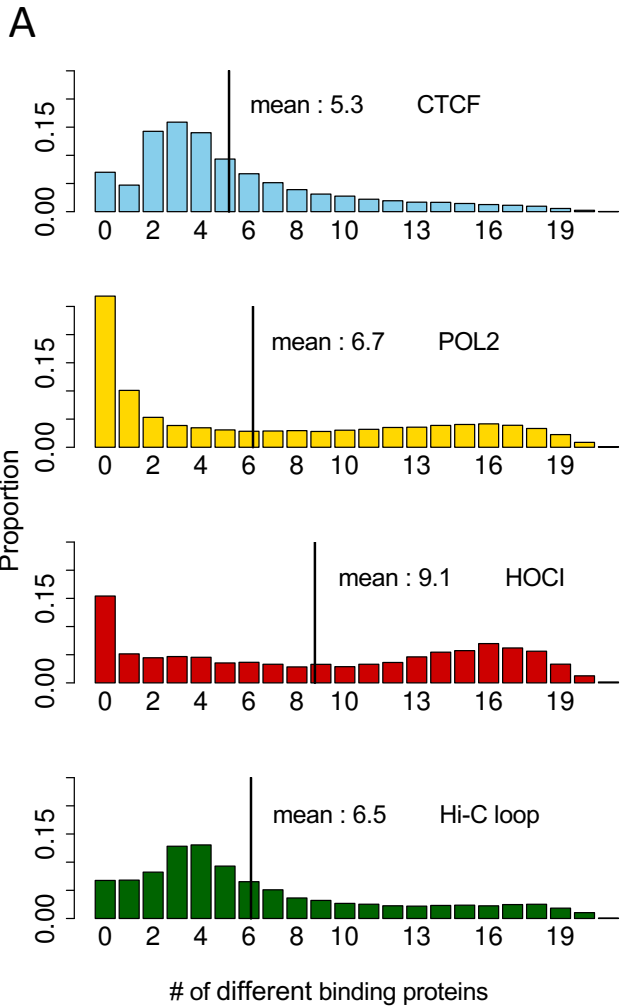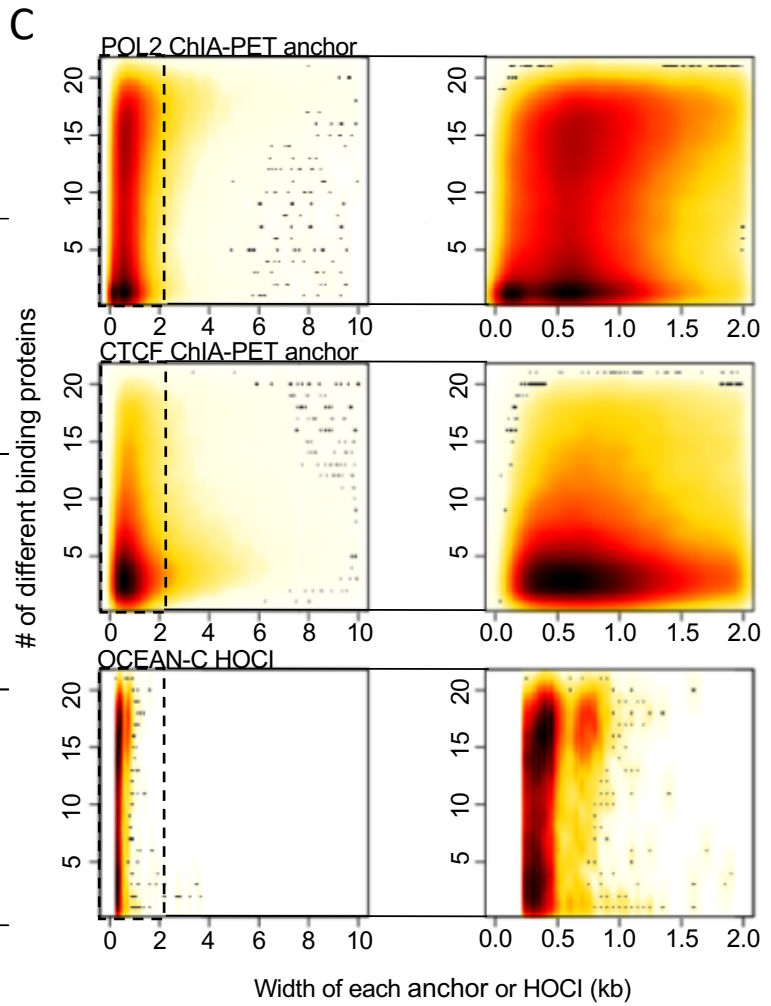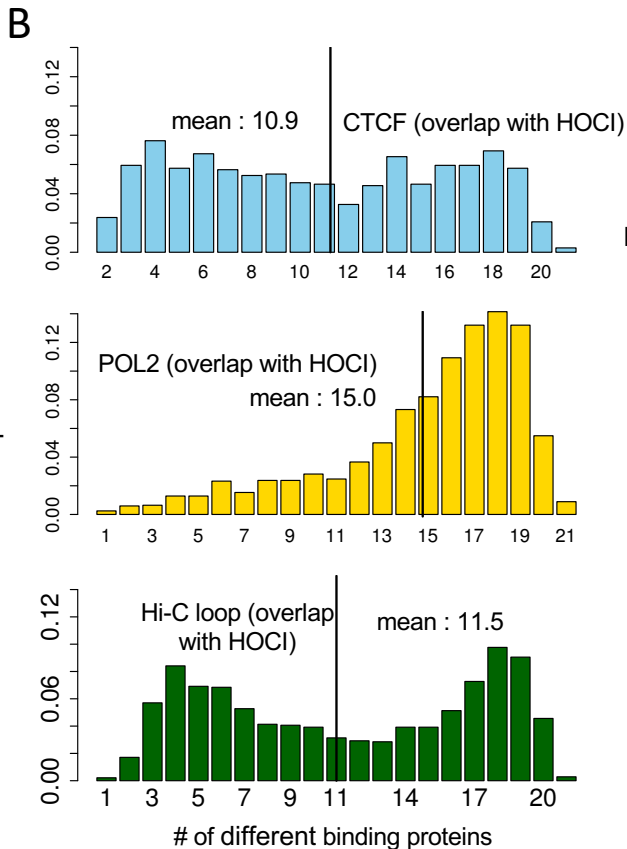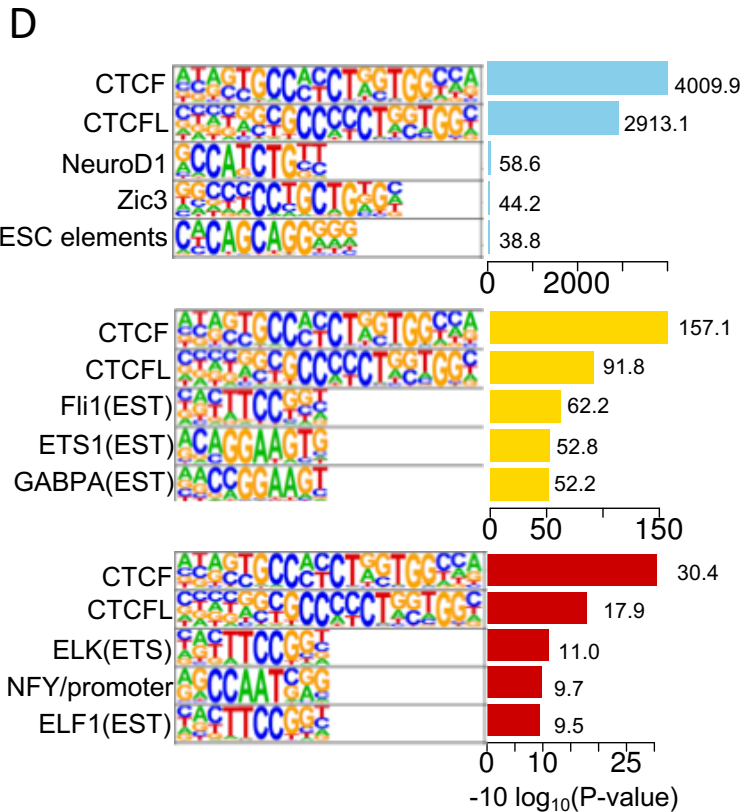

**Supplementary Figure 6.** Characteristics of HOCIs. (A) Distribution of the number of different DNA-binding proteins for HOCIs, ChIA-PET anchors and Hi-C loop anchors (GM12878). (B) Distribution of the number of DNA-binding proteins for ChIA-PET anchors and Hi-C loop anchors that overlap with HOCIs (GM12878). (C) Contour plot showing the relationship between the width and the number of DNA-binding proteins for HOCIs and ChIA-PET anchors. The areas outlined by dashed rectangles in the left panels are enlarged in the right panels. (D) Top 5 enriched motif families in CTCF ChIA-PET anchors (blue), POL2 ChIA-PET anchors (gold) and HOCIs (red).

Figure S7

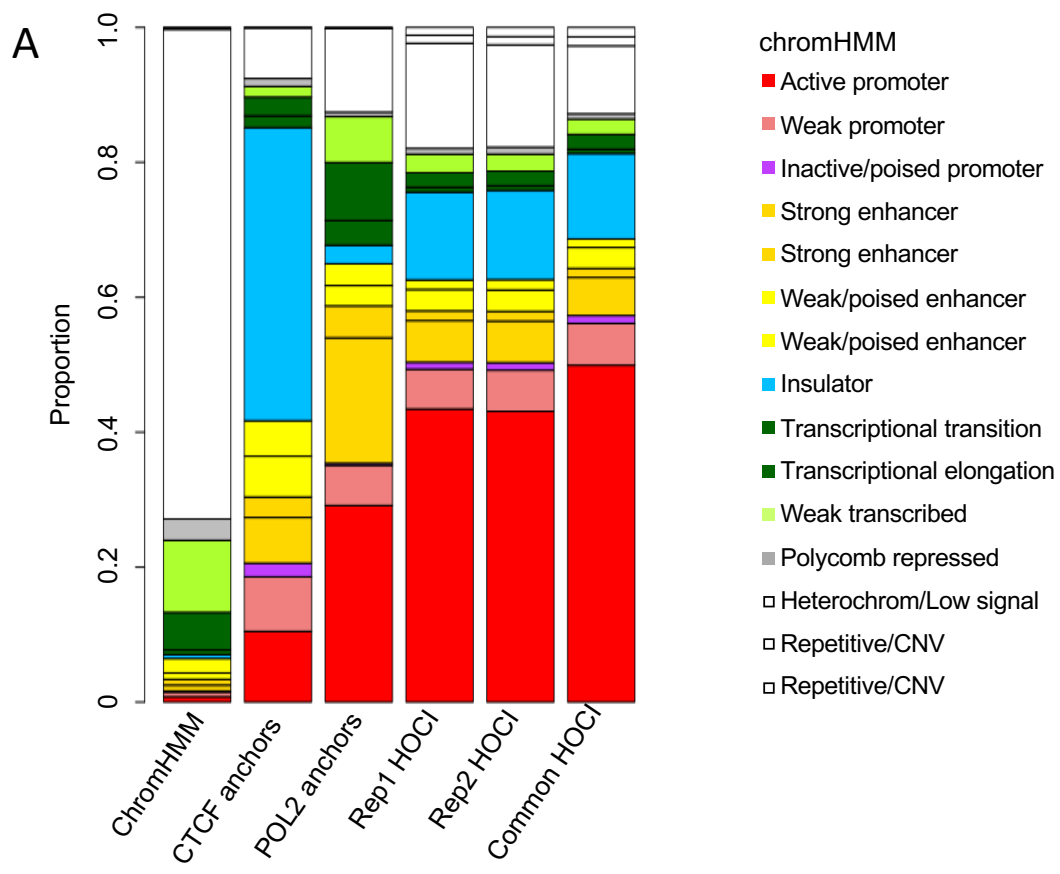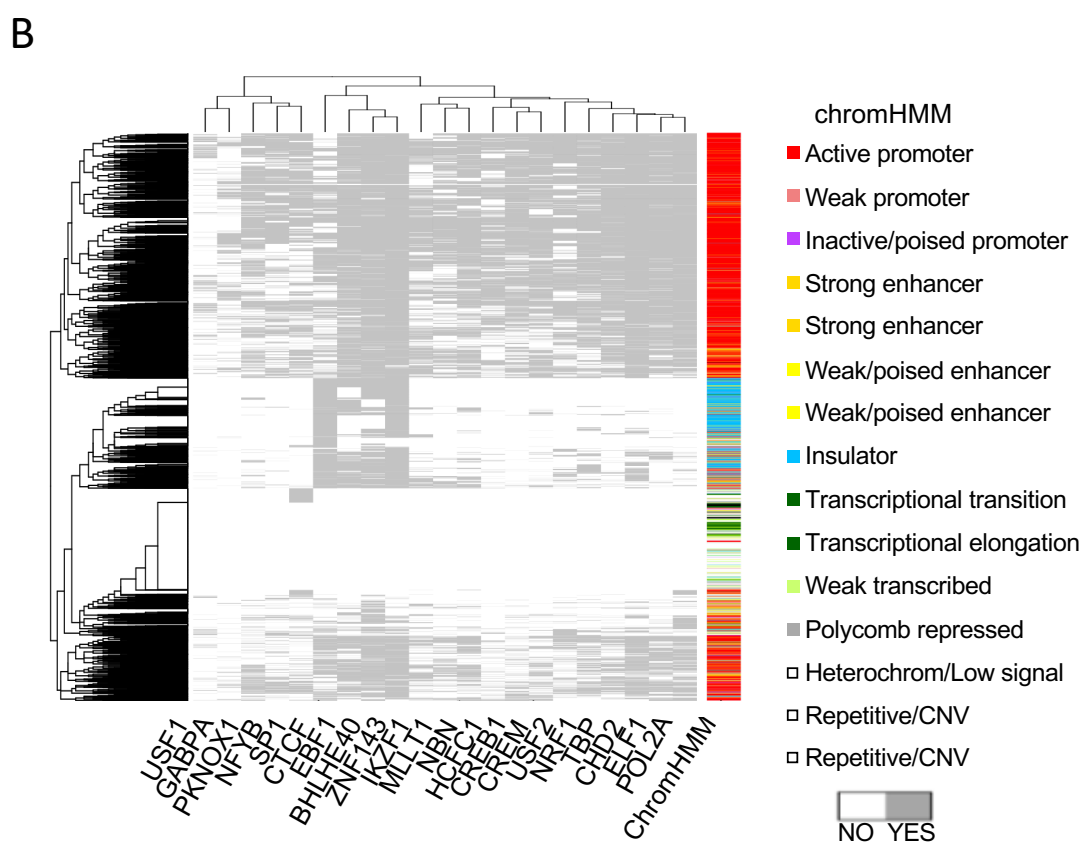

**Supplementary Figure 7. Genomic properties of HOCIs (A)**

Chromatin state distributions of ChIA-PET anchors and HOCIs

(GM12878). (B) Clustering of HOCIs according to the binding status of 21 DNA binding proteins.

Figure S8

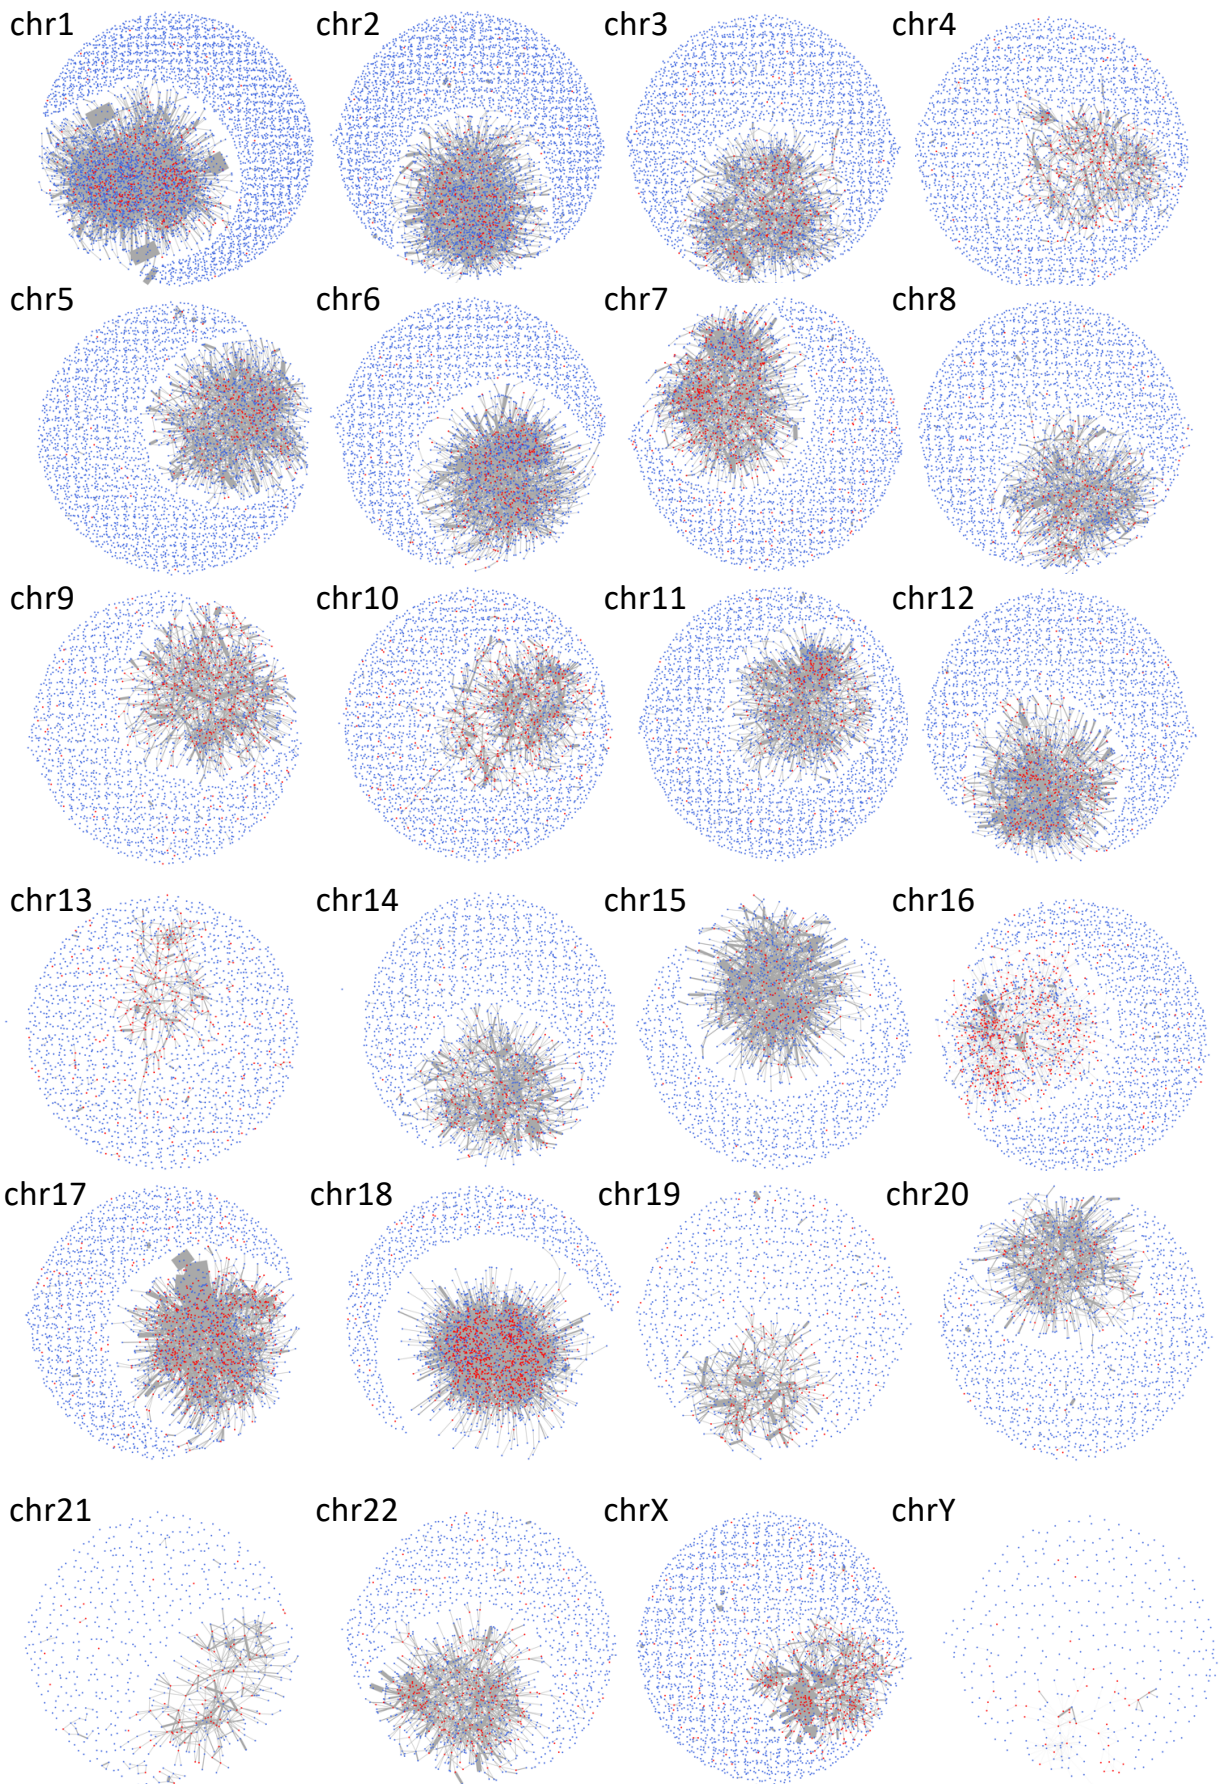

**Supplementary Figure 8. Interaction network of HOCIs in individual chromosomes.** Blue : open chromatin peaks identified by FAIRE-seq, red: open chromatin regions that overlap with HOCIs. The thickness of edges indicates the interaction intensity between HOCIs.



# Figure S9

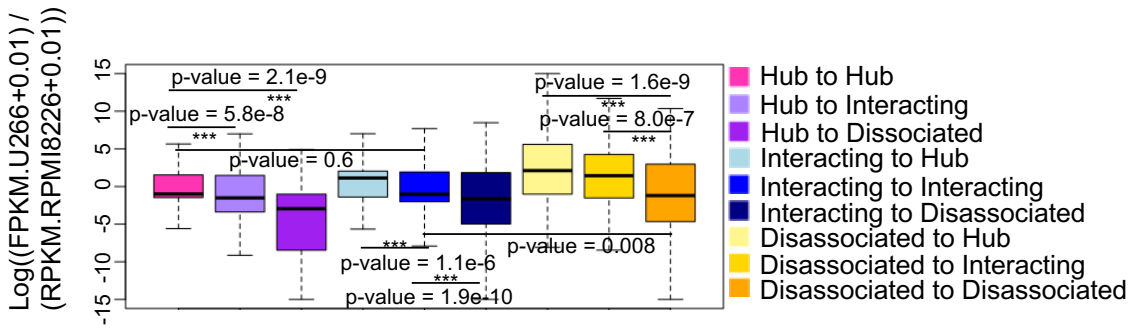

**Supplementary Figure 9. The changes of gene transcription are consistent with changes of HOCl-related interactions.** Boxplots show the differentially expression of genes classified by changes of HOCl-related interactions. p-values are generated using *t*-test.
