# Supplementary material for: OCEAN-C: mapping hubs of open chromatin interactions across the genome reveals gene regulatory networks
Source: PubMed Central journal article supplement (PMC5926533; doi:10.1186/s13059-018-1430-4), 2018-04-24
Supplement: 13059_2018_1430_MOESM2_ESM.pdf [file 13059_2018_1430_MOESM2_ESM.pdf]

**Table S1. Summary of OCEAN-C, FAIRE-seq, Hi-C and RNA-seq data.****A. Summary of OCEAN-C Data**

| Cell line       | Replicate   | Sequencing reads | Mapped and dup removed reads | Cis interact read pairs | HOCl  |
|-----------------|-------------|------------------|------------------------------|-------------------------|-------|
| <b>U266</b>     | Replicate 1 | 368411842        | 266032488                    | 53841187                | 12003 |
| <b>RPMI8226</b> | Replicate 1 | 673360694        | 394655862                    | 103416714               | 10686 |
| <b>GM12878</b>  | Replicate 1 | 407593898        | 291014471                    | 64334977                | 9505  |
| <b>GM12878</b>  | Replicate 2 | 414533876        | 290404915                    | 73268567                | 9787  |
| <b>GM12878</b>  | Combined    | 822127774        | 581419386                    | 137603544               | 12231 |

**B. Summary of FAIRE-seq Library Data**

| Cell line       | Replicate   | Sequencing reads | Mapped and filtered reads | Open chromatin |
|-----------------|-------------|------------------|---------------------------|----------------|
| <b>U266</b>     | Replicate 1 | 235007648        | 35593971                  | 69313          |
| <b>RPMI8226</b> | Replicate 1 | 226477078        | 29727633                  | 92882          |
| <b>GM12878</b>  | Replicate 1 | 200098720        | 63104334                  | 48556          |

**C. Summary of Hi-C Library Data**

| Cell line       | Replicate   | Sequencing reads | Mapped and dup removed reads | Cis interact read pairs |
|-----------------|-------------|------------------|------------------------------|-------------------------|
| <b>U266</b>     | Replicate 1 | 208522886        | 183274599                    | 43383922                |
| <b>RPMI8226</b> | Replicate 1 | 244454180        | 211240383                    | 48657005                |
| <b>GM12878</b>  | Replicate 1 | 409620210        | 234606571                    | 50428576                |

**D. Summary of RNA-seq Library Data**

| Cell line       | Replicate   | Sequencing reads | Mapped and filtered reads |
|-----------------|-------------|------------------|---------------------------|
| <b>U266</b>     | Replicate 1 | 32184358         | 30581367                  |
| <b>U266</b>     | Replicate 2 | 40382044         | 37450514                  |
| <b>U266</b>     | Replicate 3 | 42281606         | 40679308                  |
| <b>U266</b>     | Combined    | 114848008        | 108711189                 |
| <b>RPMI8226</b> | Replicate 1 | 34837134         | 32559191                  |
| <b>RPMI8226</b> | Replicate 2 | 40040036         | 37868327                  |
| <b>RPMI8226</b> | Replicate 3 | 37013790         | 35137569                  |
| <b>RPMI8226</b> | Combined    | 111890960        | 105565087                 |
