# Supplementary material for: OCEAN-C: mapping hubs of open chromatin interactions across the genome reveals gene regulatory networks
Source: PubMed Central journal article supplement (PMC5926533; doi:10.1186/s13059-018-1430-4), 2018-04-24
Supplement: 13059_2018_1430_MOESM3_ESM.pdf [file 13059_2018_1430_MOESM3_ESM.pdf]

**Table S2. Summary of HOCl and gene expression data analysis****A. Comparison of HOCl, ChIA-PET anchor and Hi-C loop anchor**

|                                     | <b>Overlapped HOClS (total: 12231)</b> |
|-------------------------------------|----------------------------------------|
| Anchors of CTCF ChIA-PET(185614)    | 4998(41%)                              |
| Anchors of Pol II ChIA-PET(227182)  | 4454(47%)                              |
| Loop anchors of in situ Hi-C(12903) | 2524(21%)                              |

**B. Comparison of TAD boundary detected from Hi-C data and HOCl detected from OCEAN-C data**

|                     | <b>Total HOClS</b> | <b>HOClS overlapped with TAD boundaries</b> | <b>Number of Boundaries</b> | <b>mean of random sampling HOClS overlapped with TAD boundaries</b> | <b>P-value</b> |
|---------------------|--------------------|---------------------------------------------|-----------------------------|---------------------------------------------------------------------|----------------|
| <b>U266</b>         | 12003              | 1152                                        | 4253                        | 709                                                                 | 5.2e-35        |
| <b>RPMI8226</b>     | 14592              | 898                                         | 4429                        | 617                                                                 | 1.0e-28        |
| <b>GM12878 rep1</b> | 9505               | 782                                         | 4259                        | 500                                                                 | 2.3e-34        |
| <b>GM12878 rep2</b> | 9787               | 802                                         | 4259                        | 515                                                                 | 5.3e-25        |

**C. RPKM of three different types of genes**

| <b>Types</b>        | <b>U266</b>                    |                                 |                    | <b>RPMI8226</b>                |                                 |                    |
|---------------------|--------------------------------|---------------------------------|--------------------|--------------------------------|---------------------------------|--------------------|
|                     | <b>Gene Number (All:22372)</b> | <b>Exp Gene (RPKM&gt;= 0.5)</b> | <b>Mean (RPKM)</b> | <b>Gene Number (All:22372)</b> | <b>Exp Gene (RPKM&gt;= 0.5)</b> | <b>Mean (RPKM)</b> |
| <b>Hub</b>          | 5780                           | 5072(87.8%)                     | 46.8               | 4206                           | 3724(88.5%)                     | 48.2               |
| <b>Interacting</b>  | 10617                          | 5230 (49.3%)                    | 42.7               | 13401                          | 6838(51.0%)                     | 43.1               |
| <b>Dissociative</b> | 5975                           | 1301(21.8%)                     | 18.5               | 4765                           | 1187(24.9%)                     | 22.0               |

**D. The components of expressed gene in U266 and RPMI8226 cell line**

|                                         | <b>U266</b>  | <b>RPMI8226</b> |
|-----------------------------------------|--------------|-----------------|
| <b>Expressed Genes (RPKM &gt;= 0.5)</b> | 11603        | 11749           |
| <b>Expressed Hub Genes</b>              | 5072 (43.7%) | 3724 (31.7%)    |
| <b>Expressed Interacting Genes</b>      | 5230 (45%)   | 6838(58.2%)     |
| <b>Expressed Hub/Interacting Gene</b>   | 10302(88.7%) | 10562(89.9%)    |

**E. The components of housekeeping gene**

| <b>Housekeeping Gene (3640)</b> | <b>Types</b>        | <b>U266 cell</b> | <b>RPMI8226 cell</b> |
|---------------------------------|---------------------|------------------|----------------------|
|                                 | <b>Hub</b>          | 1901(52.2%)      | 1415(38.9%)          |
|                                 | <b>Interacting</b>  | 1435(39.4%)      | 1971(54.1%)          |
|                                 | <b>Dissociative</b> | 304(8.4%)        | 254(7%)              |
