# Supplementary material for: OCEAN-C: mapping hubs of open chromatin interactions across the genome reveals gene regulatory networks
Source: PubMed Central journal article supplement (PMC5926533; doi:10.1186/s13059-018-1430-4), 2018-04-24
Supplement: 13059_2018_1430_MOESM4_ESM.pdf [file 13059_2018_1430_MOESM4_ESM.pdf]

**Table S3. Information of public data used in this study**

## A. ChIP-seq data of GM12878 cell line.

| protein  | ENCODE Accession | protein  | ENCODE Accession |
|----------|------------------|----------|------------------|
| PKNOX1   | ENCFF869BJB      | USF1     | ENCFF281OFW      |
| BHLHE40  | ENCFF431VZN      | EBF1     | ENCFF000VUS      |
| ZNF143   | ENCFF000WGJ      | SP1      | ENCFF000OEL      |
| CREB1    | ENCFF000NTW      | NFYB     | ENCFF000VZX      |
| ELF1     | ENCFF000NUX      | HCFC1    | ENCFF370WJQ      |
| CHD2     | ENCFF000VTS      | IKZF1    | ENCFF648SPM      |
| GABPA    | ENCFF249FIH      | USF2     | ENCFF000WFU      |
| CREM     | ENCFF500GPO      | NRF1     | ENCFF000WAH      |
| TBP      | ENCFF000WFG      | CTCF     | ENCFF389RQC      |
| MLLT1    | ENCFF076TDR      | H3K4me3  | ENCSTR000AKA     |
| POL2A    | ENCFF865BUP      | H3K27ac  | ENCSTR000AKC     |
| NBN      | ENCFF282JRK      | H3K27me3 | ENCSTR000AKD     |
| H3K4me1  | ENCSTR000AKF     | H3K9me3  | ENCSTR000AOX     |
| H3K36me3 | ENCSTR000AKE     |          |                  |

## B. ChIA-PET and Hi-C loop data of GM12878 cell line

| sample        | GEO accession |
|---------------|---------------|
| CTCF ChIA-PET | GSM1872886    |
| POL2 ChIA-PET | GSM1872887    |
| Hi-C loop     | GSE63525      |

## C. ChIP-seq data of U266 cell lines

| protein | U266 (SRA Accession) | protein  | U266 (SRA Accession) |
|---------|----------------------|----------|----------------------|
| H3K4me3 | ERR324261            | H3K36me3 | ERR324288            |
| H3K4me1 | ERR324265            | H3K27me3 | ERR324301            |
| H3K27ac | ERR324308            | H3K9me3  | ERR324281            |
| DP1     | SRR3440074           | E2F1     | SRR3440075           |

## D. Public data of K562 cell line

| sample        | GEO accession | sample    | GEO accession |
|---------------|---------------|-----------|---------------|
| DNase-C       | GSM1370434    | FAIRE-seq | GSM864340     |
| DNase-seq     | GSM2400523    | H3K9me3   | GSM733776     |
| POL2 ChIA-PET | GSM970213     | H3K27me3  | GSM733658     |
| CTCF ChIA-PET | GSM970216     | H3K27ac   | GSM733656     |
| H3K4me1       | GSM733692     | H3K4me3   | GSM2534288    |
| H3K36me3      | GSM733714     |           |               |
